# Supplementary material
Source: ML conference proceedings conference paper supplement (https://openreview.net/forum?id=1epaSm9QRs)
Supplement: supplementary_material [file attachment]



# Relation Prediction as an Auxiliary Training Objective for Improving Multi-Relational Graph Representations

Yihong Chen, Pasquale Minervini, Sebastian Riedel, Pontus Stenetorp

University College London  
Facebook AI Research London

# Knowledge Base Completion (KBC)

The task of KBC demands good representation learning on multi-relational graphs.

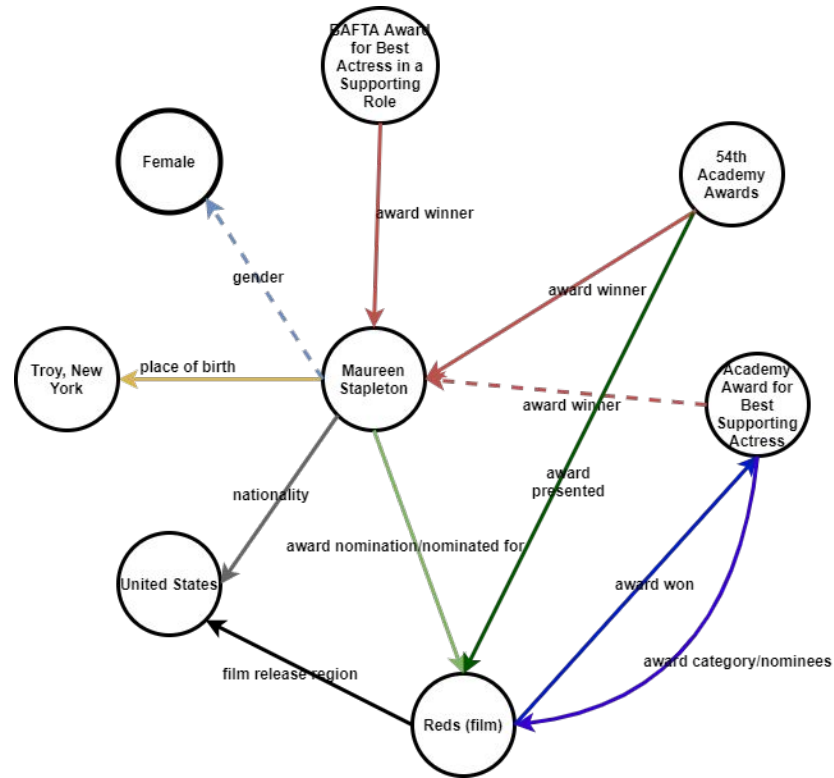



# History of KBC Models

Models get more and more complex ...

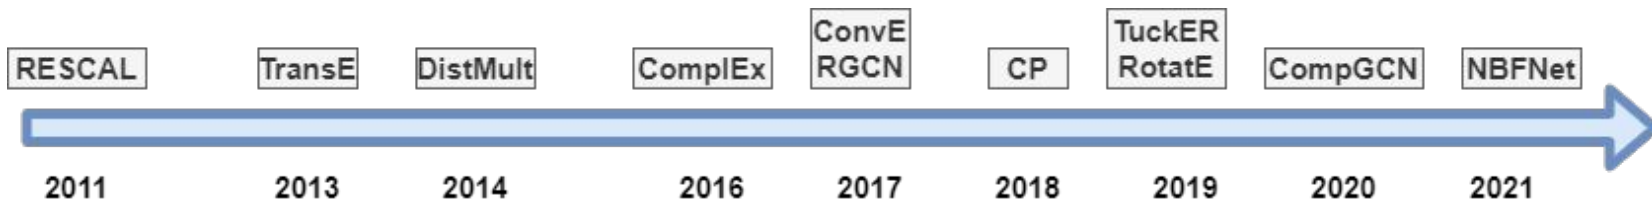

# Re-evaluation of KBC Models

## A Re-evaluation of Knowledge Graph Completion Methods

Zhiqing Sun<sup>1\*</sup> Shikhar Vashishth<sup>1,2\*</sup> Soumya Sanyal<sup>2\*</sup>  
Partha Talukdar<sup>2</sup> Yiming Yang<sup>1</sup>

<sup>1</sup> Carnegie Mellon University, <sup>2</sup> Indian Institute of Science

## Knowledge Base Completion: Baseline Strikes Back (Again)

Prachi Jain<sup>1</sup>, Sushant Rathi<sup>1</sup>, Mausam<sup>1</sup> and Soumen Chakrabarti<sup>2</sup>

<sup>1</sup> Indian Institute of Technology Delhi

<sup>2</sup> Indian Institute of Technology Bombay

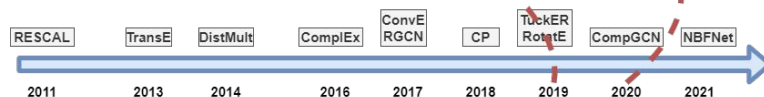

## Knowledge Base Completion: Baselines Strike Back

Rudolf Kadlec and Ondrej Bajgar and Jan Kleindienst  
IBM Watson  
V Parku 4, 140 00 Prague, Czech Republic

## YOU CAN TEACH AN OLD DOG NEW TRICKS! ON TRAINING KNOWLEDGE GRAPH EMBEDDINGS

Daniel Ruffinelli<sup>\*</sup>  
Data and Web Science Group  
University of Mannheim, Germany

Samuel Broschelt<sup>\*</sup>  
Data and Web Science Group  
University of Mannheim, Germany

Rainer Gemulla<sup>\*</sup>  
Data and Web Science Group  
University of Mannheim, Germany

Loss Function Reciprocal

1vsAll

Optimizer

Negative Sampling

Regularizer

Simple Models with Appropriate Training Strategies

≈

Complicated Models

?!

# Relation Prediction as An Auxiliary Training Objective for KBC

A new self-supervised training objective

- not only predicting entities
- but also predicting relations

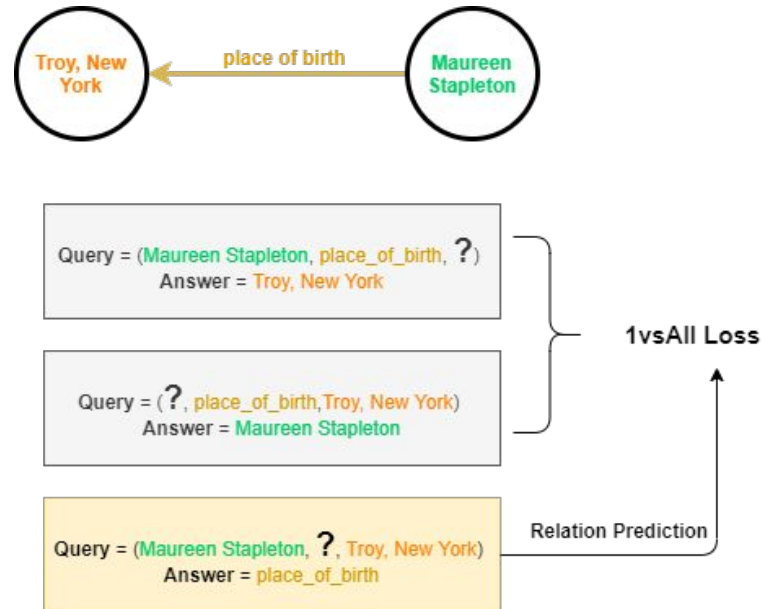



## Including Relation Prediction into 1vsAll Objective

$$\arg \max_{\theta \in \Theta} \sum_{\langle s, p, o \rangle \in \mathcal{G}} [\log P_{\theta}(s \mid p, o) + \log P_{\theta}(o \mid s, p) + \lambda \log P_{\theta}(p \mid s, o)]$$

with  $\log P_{\theta}(p \mid s, o) = \phi_{\theta}(s, p, o) - \log \sum_{p' \in \mathcal{R}} \exp [\phi_{\theta}(s, p', o)],$

$\lambda$  : hyper-parameter balancing the entity prediction and relation prediction

# Experiments

How does relation prediction impact various models on different datasets?

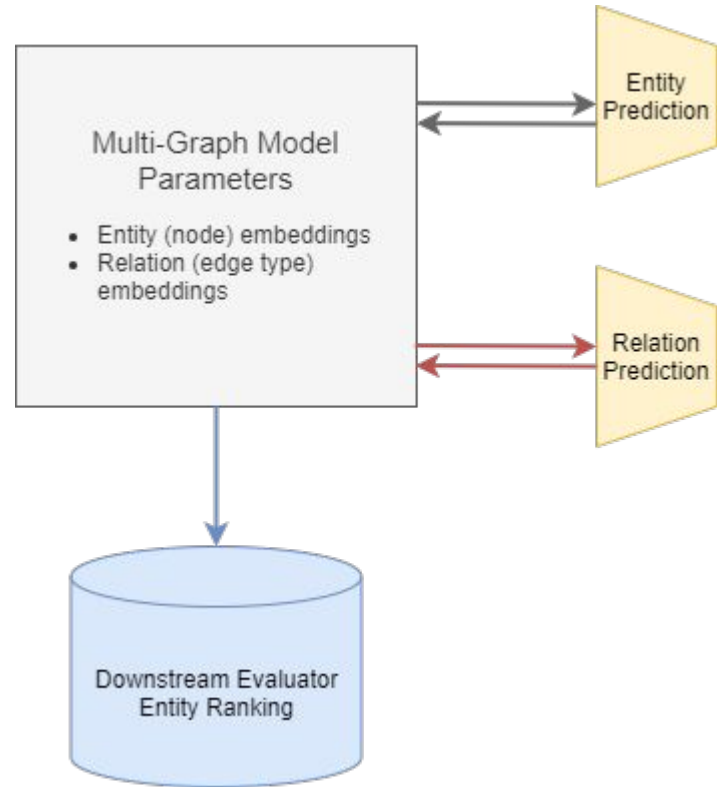



# Experimental Setup

**Models** RESCAL, ComplEx, CP, Tucker

extensive hyper-parameters search  
based on validation set  
 $\approx 41,316$  runs

| Dataset   | $ \mathcal{E} $ | $ \mathcal{R} $ | #Train  | #Validation | #Test  |
|-----------|-----------------|-----------------|---------|-------------|--------|
| Nations   | 14              | 55              | 1,592   | 100         | 301    |
| UMLS      | 135             | 46              | 5,216   | 652         | 661    |
| Kinship   | 104             | 25              | 8,544   | 1,068       | 1,074  |
| WN18RR    | 40,943          | 11              | 86,835  | 3,034       | 3,134  |
| FB15k-237 | 27,395          | 237             | 272,115 | 17,535      | 20,466 |
| Aristo-v4 | 44,950          | 1,605           | 242,594 | 20,000      | 20,000 |



# Test Performance on All Datasets

| Dataset | Entity Prediction | Relation Prediction | MRR          | Hits@1       | Hits@3       | Hits@10      |
|---------|-------------------|---------------------|--------------|--------------|--------------|--------------|
| Kinship | ✗                 | ✓                   | <b>0.920</b> | <b>0.867</b> | <b>0.970</b> | <b>0.990</b> |
|         | ✓                 | ✗                   | 0.897        | 0.835        | 0.955        | 0.987        |
|         | ✓                 | ✓                   | 0.916        | 0.866        | 0.964        | 0.988        |
| Nations | ✗                 | ✓                   | 0.686        | 0.493        | 0.871        | 0.998        |
|         | ✓                 | ✗                   | 0.813        | 0.701        | <b>0.915</b> | <b>1.000</b> |
|         | ✓                 | ✓                   | <b>0.827</b> | <b>0.726</b> | <b>0.915</b> | 0.998        |
| UMLS    | ✗                 | ✓                   | 0.863        | 0.795        | 0.914        | 0.979        |
|         | ✓                 | ✗                   | 0.960        | 0.930        | <b>0.991</b> | <b>0.998</b> |
|         | ✓                 | ✓                   | <b>0.971</b> | <b>0.954</b> | 0.986        | 0.997        |

| Dataset   | Entity Prediction | Relation Prediction | MRR          | Hits@1       | Hits@3       | Hits@10      |
|-----------|-------------------|---------------------|--------------|--------------|--------------|--------------|
| WN18RR    | ✗                 | ✓                   | 0.258        | 0.212        | 0.290        | 0.339        |
|           | ✓                 | ✗                   | 0.487        | 0.441        | 0.501        | <b>0.580</b> |
|           | ✓                 | ✓                   | <b>0.488</b> | <b>0.443</b> | <b>0.505</b> | 0.578        |
| FB15K-237 | ✗                 | ✓                   | 0.263        | 0.187        | 0.287        | 0.411        |
|           | ✓                 | ✗                   | 0.366        | 0.271        | 0.401        | 0.557        |
|           | ✓                 | ✓                   | <b>0.388</b> | <b>0.298</b> | <b>0.425</b> | <b>0.568</b> |
| Aristo-v4 | ✗                 | ✓                   | 0.169        | 0.120        | 0.177        | 0.267        |
|           | ✓                 | ✗                   | 0.301        | 0.232        | 0.324        | 0.438        |
|           | ✓                 | ✓                   | <b>0.311</b> | <b>0.240</b> | <b>0.336</b> | <b>0.447</b> |



## Test Performance Across Various Models, $\lambda=1$

| Model   | Relation Prediction | MRR          | Hits@1       | Hits@3       | Hits@10      |
|---------|---------------------|--------------|--------------|--------------|--------------|
| CP      | ✗                   | 0.356        | 0.262        | 0.392        | 0.546        |
|         | ✓                   | <b>0.366</b> | <b>0.274</b> | <b>0.401</b> | <b>0.550</b> |
| ComplEx | ✗                   | 0.366        | 0.271        | 0.401        | 0.557        |
|         | ✓                   | <b>0.382</b> | <b>0.289</b> | <b>0.419</b> | <b>0.568</b> |
| RESCAL  | ✗                   | 0.356        | 0.266        | 0.390        | 0.532        |
|         | ✓                   | <b>0.359</b> | <b>0.271</b> | <b>0.395</b> | <b>0.533</b> |
| TuckER  | ✗                   | 0.351        | 0.260        | 0.386        | 0.532        |
|         | ✓                   | <b>0.354</b> | <b>0.264</b> | <b>0.388</b> | <b>0.535</b> |

# Ablation Study: Embedding Size & Number of Relation Types

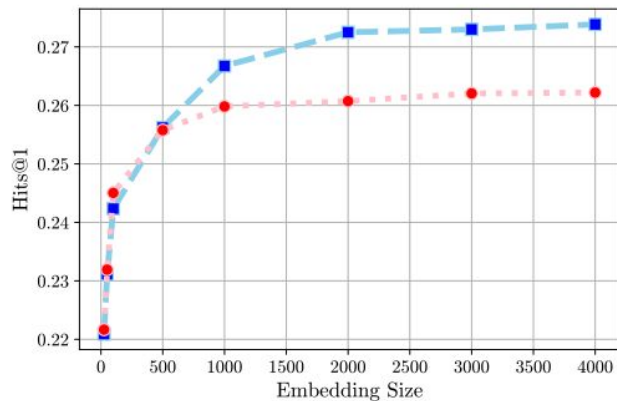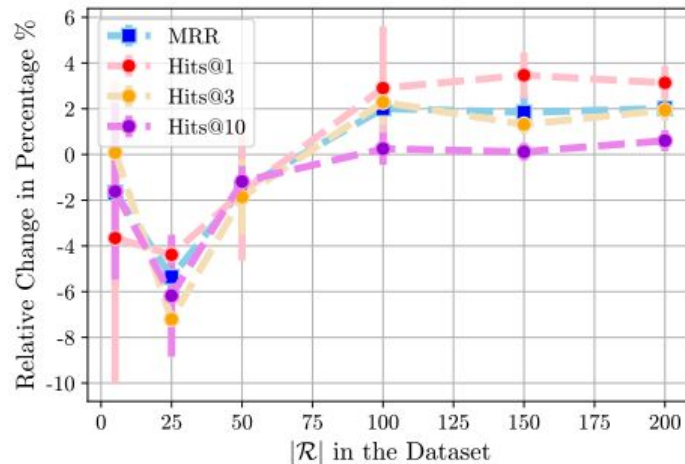



# Summary

Relation Prediction as an Auxiliary  
Objective for Training KBC Models

## Conclusion

- a new self-supervised objective for training KBC models
- up to 9.9% boost in Hits@1 on FB15k-237

## Future Work

- extend to more complex models
- downstream applications besides link prediction
  - node classification

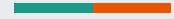

**Thank you :)**

**Q&A**
